# Supplementary material for: In Situ Synthesis of a Tumor-Microenvironment-Responsive Chemotherapy Drug
Source: MDPI journal article supplement (doi:10.3390/pharmaceutics15041316), 2023-04-21
Supplement: s1 [file s1]

# Supplementary Material: In situ synthesis of tumor-microenvironment-responsive chemotherapy drug

Xiupeng Wang, Ayako Oyane, Tomoya Inose, Maki Nakamura

## S1. Supplementary data

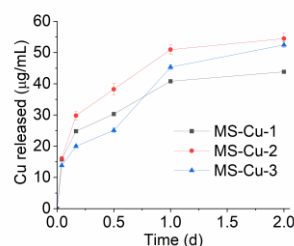

**Figure S1.** In vitro copper ion release from MS-Cu nanospheres

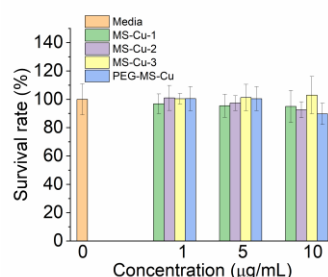

**Figure S2.** In vitro safety of MS-Cu and PEG-MS-Cu nanospheres

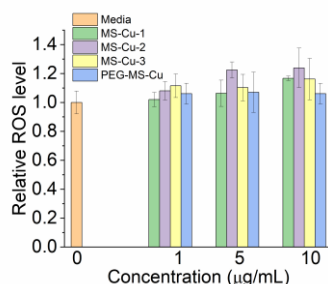

**Figure S3.** In vitro reactive oxygen species generation by MS-Cu and PEG-MS-Cu nanospheres

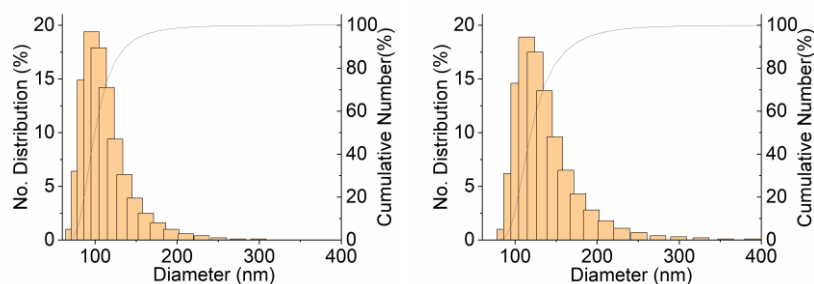

**Figure S4.** The particle size of PEG-MS-Cu nanospheres tested by dynamic light scattering analysis immediately (left) and 3d (right) after ultrasonication.

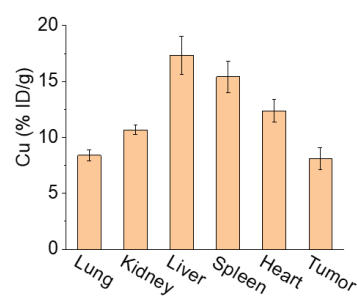

Figure S5. In vivo distribution of PEG-MS-Cu nanospheres

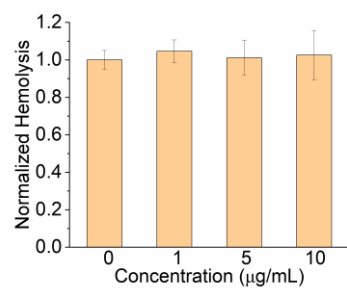

Figure S6. Hemolysis of PEG-MS-Cu nanospheres
